# Supplementary material for: Mortality Predictive Value of the C2HEST Score in Elderly Subjects with COVID-19—A Subanalysis of the COLOS Study
Source: MDPI journal article supplement (doi:10.3390/jcm11040992), 2022-02-14
Supplement: s1 [file s1]

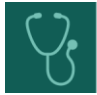

1. The strength of the association between CH2EST-score and study endpoints including non-fatal adverse events is presented in Figure S1 (OR overall and OR for low vs high C2HEST risk score) and Table S1

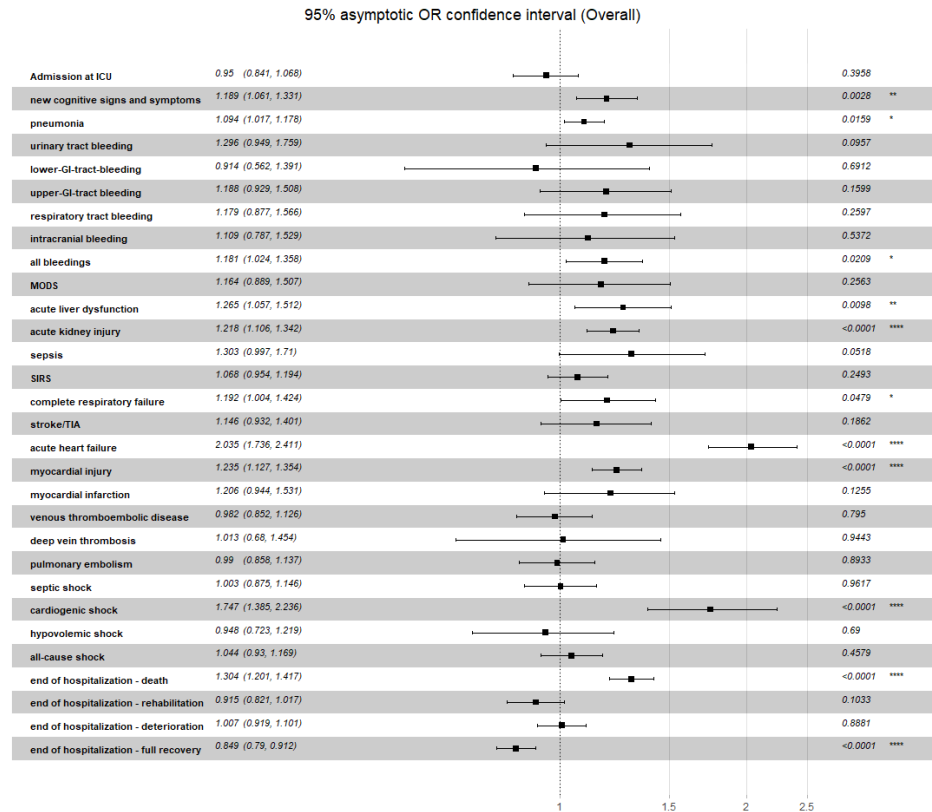

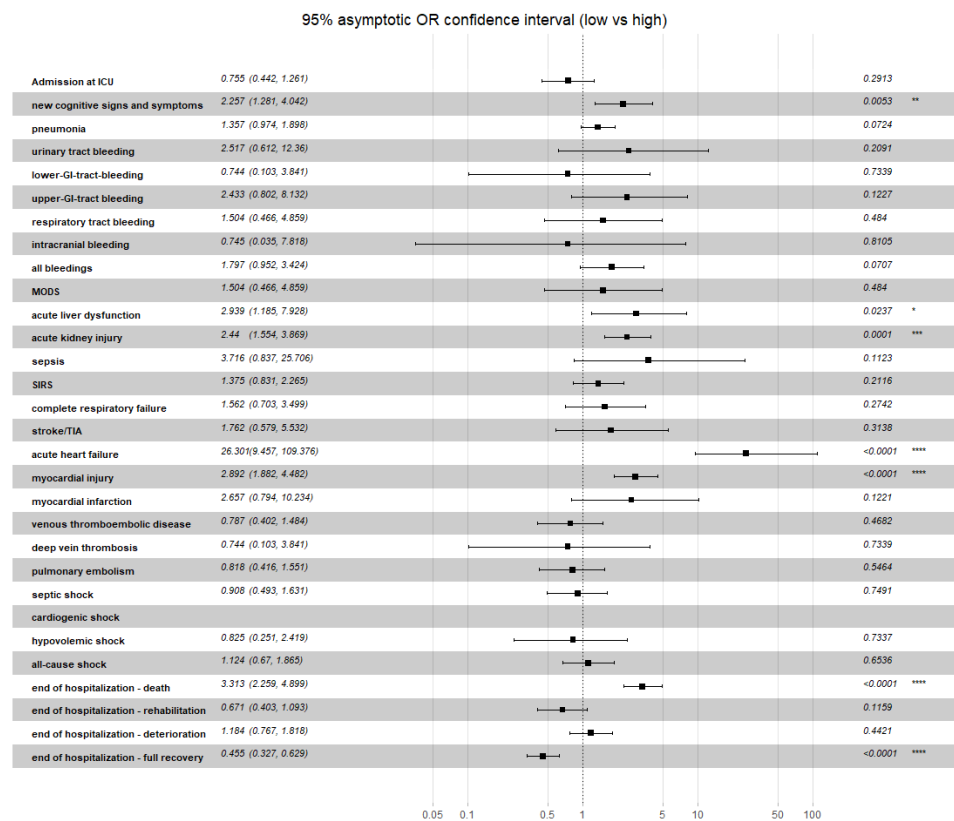

Figure S1. 95% Asymptotic OR Confidence Interval (low vs high).

Table S1. The strength of the association between CH2EST-score and study endpoints.

| Endpoint                                | comparison    | OR    | Low CI | High CI | P value  |
|-----------------------------------------|---------------|-------|--------|---------|----------|
| End of hospitalization - full recovery  | overall       | 0.849 | 0.790  | 0.912   | < 0.0001 |
|                                         | low vs medium | 0.573 | 0.432  | 0.758   | 0.0001   |
|                                         | low vs high   | 0.455 | 0.327  | 0.629   | < 0.0001 |
| End of hospitalization - deterioration  | overall       | 1.007 | 0.919  | 1.101   | 0.8881   |
|                                         | low vs medium | 1.467 | 1.018  | 2.126   | 0.0412   |
|                                         | low vs high   | 1.184 | 0.767  | 1.818   | 0.4421   |
| End of hospitalization - rehabilitation | overall       | 0.915 | 0.821  | 1.017   | 0.1033   |
|                                         | low vs medium | 0.882 | 0.589  | 1.320   | 0.5407   |
|                                         | low vs high   | 0.671 | 0.403  | 1.093   | 0.1159   |
| End of hospitalization - death          | overall       | 1.304 | 1.201  | 1.417   | < 0.0001 |
|                                         | low vs medium | 1.894 | 1.320  | 2.742   | 0.0006   |
|                                         | low vs high   | 3.313 | 2.259  | 4.899   | < 0.0001 |
| All-cause shock                         | overall       | 1.044 | 0.930  | 1.169   | 0.4579   |
|                                         | low vs medium | 0.837 | 0.520  | 1.344   | 0.4609   |
|                                         | low vs high   | 1.124 | 0.670  | 1.865   | 0.6536   |
| Hypovolemic shock                       | overall       | 0.948 | 0.723  | 1.219   | 0.69     |
|                                         | low vs medium | 0.592 | 0.197  | 1.659   | 0.325    |
|                                         | low vs high   | 0.825 | 0.251  | 2.419   | 0.7337   |
| Cardiogenic shock                       | overall       | 1.747 | 1.385  | 2.236   | < 0.0001 |
|                                         | low vs medium | NA    | NA     | NA      | NA       |
|                                         | low vs high   | NA    | NA     | NA      | NA       |
| Septic shock                            | overall       | 1.003 | 0.875  | 1.146   | 0.9617   |
|                                         | low vs medium | 0.706 | 0.406  | 1.217   | 0.212    |
|                                         | low vs high   | 0.908 | 0.493  | 1.631   | 0.7491   |

| Endpoint                      | comparison    | OR     | Low CI | High CI | P value  |
|-------------------------------|---------------|--------|--------|---------|----------|
| pulmonary embolism            | overall       | 0.990  | 0.858  | 1.137   | 0.8933   |
|                               | low vs medium | 0.890  | 0.511  | 1.552   | 0.6803   |
|                               | low vs high   | 0.818  | 0.416  | 1.551   | 0.5464   |
| deep vein thrombosis          | overall       | 1.013  | 0.680  | 1.454   | 0.9443   |
|                               | low vs medium | 0.671  | 0.131  | 3.061   | 0.6025   |
|                               | low vs high   | 0.744  | 0.103  | 3.841   | 0.7339   |
| venous thromboembolic disease | overall       | 0.982  | 0.852  | 1.126   | 0.795    |
|                               | low vs medium | 0.890  | 0.516  | 1.537   | 0.6743   |
|                               | low vs high   | 0.787  | 0.402  | 1.484   | 0.4682   |
| myocardial infarction         | overall       | 1.206  | 0.944  | 1.531   | 0.1255   |
|                               | low vs medium | 2.041  | 0.659  | 7.585   | 0.2383   |
|                               | low vs high   | 2.657  | 0.794  | 10.234  | 0.1221   |
| myocardial injury             | overall       | 1.235  | 1.127  | 1.354   | < 0.0001 |
|                               | low vs medium | 1.790  | 1.198  | 2.697   | 0.0048   |
|                               | low vs high   | 2.892  | 1.882  | 4.482   | < 0.0001 |
| acute heart failure           | overall       | 2.035  | 1.736  | 2.411   | < 0.0001 |
|                               | low vs medium | 4.298  | 1.390  | 18.751  | 0.0228   |
|                               | low vs high   | 26.301 | 9.457  | 109.376 | < 0.0001 |
| stroke/TIA                    | overall       | 1.146  | 0.932  | 1.401   | 0.1862   |
|                               | low vs medium | 2.448  | 0.995  | 6.884   | 0.0643   |
|                               | low vs high   | 1.762  | 0.579  | 5.532   | 0.3138   |
| complete respiratory failure  | overall       | 1.192  | 1.004  | 1.424   | 0.0479   |
|                               | low vs medium | 1.123  | 0.528  | 2.391   | 0.7626   |
|                               | low vs high   | 1.562  | 0.703  | 3.499   | 0.2742   |
| SIRS                          | overall       | 1.068  | 0.954  | 1.194   | 0.2493   |
|                               | low vs medium | 0.913  | 0.566  | 1.472   | 0.7075   |
|                               | low vs high   | 1.375  | 0.831  | 2.265   | 0.2116   |
| sepsis                        | overall       | 1.303  | 0.997  | 1.710   | 0.0518   |
|                               | low vs medium | 3.236  | 0.766  | 21.976  | 0.1474   |
|                               | low vs high   | 3.716  | 0.837  | 25.706  | 0.1123   |
| acute kidney injury           | overall       | 1.218  | 1.106  | 1.342   | < 0.0001 |
|                               | low vs medium | 1.502  | 0.974  | 2.341   | 0.0682   |
|                               | low vs high   | 2.440  | 1.554  | 3.869   | 0.0001   |
| acute liver dysfunction       | overall       | 1.265  | 1.057  | 1.512   | 0.0098   |
|                               | low vs medium | 2.199  | 0.937  | 5.746   | 0.0834   |
|                               | low vs high   | 2.939  | 1.185  | 7.928   | 0.0237   |
| MODS                          | overall       | 1.164  | 0.889  | 1.507   | 0.2563   |
|                               | low vs medium | 0.745  | 0.213  | 2.492   | 0.6289   |
|                               | low vs high   | 1.504  | 0.466  | 4.859   | 0.484    |
| all bleedings                 | overall       | 1.181  | 1.024  | 1.358   | 0.0209   |
|                               | low vs medium | 0.991  | 0.524  | 1.889   | 0.9788   |
|                               | low vs high   | 1.797  | 0.952  | 3.424   | 0.0707   |
| intracranial bleeding         | overall       | 1.109  | 0.787  | 1.529   | 0.5372   |
|                               | low vs medium | 3.640  | 0.905  | 24.217  | 0.1036   |
|                               | low vs high   | 0.745  | 0.035  | 7.818   | 0.8105   |
| respiratory tract bleeding    | overall       | 1.179  | 0.877  | 1.566   | 0.2597   |
|                               | low vs medium | 0.296  | 0.043  | 1.293   | 0.1372   |
|                               | low vs high   | 1.504  | 0.466  | 4.859   | 0.484    |
| upper-GI-tract bleeding       | overall       | 1.188  | 0.929  | 1.508   | 0.1599   |
|                               | low vs medium | 1.261  | 0.399  | 4.291   | 0.6945   |
|                               | low vs high   | 2.433  | 0.802  | 8.132   | 0.1227   |

| Endpoint                | comparison    | OR    | Low CI | High CI | P value |
|-------------------------|---------------|-------|--------|---------|---------|
| lower-GI-tract-bleeding | overall       | 0.914 | 0.562  | 1.391   | 0.6912  |
|                         | low vs medium | 0.222 | 0.011  | 1.512   | 0.1797  |
|                         | low vs high   | 0.744 | 0.103  | 3.841   | 0.7339  |
| urinary tract bleeding  | overall       | 1.296 | 0.949  | 1.759   | 0.0957  |
|                         | low vs medium | 1.198 | 0.263  | 6.117   | 0.8135  |
|                         | low vs high   | 2.517 | 0.612  | 12.360  | 0.2091  |
| pneumonia               | overall       | 1.094 | 1.017  | 1.178   | 0.0159  |
|                         | low vs medium | 1.156 | 0.868  | 1.539   | 0.3211  |
|                         | low vs high   | 1.357 | 0.974  | 1.898   | 0.0724  |

## 2. C2HEST-OD – expansion of the C2HEST score by adding the presence of diabetes mellitus and obesity

In order to verify if including obesity and diabetes mellitus to the extended version of the C2HEST score (C2HEST-OD), we have performed the analysis presented below:

### A.1 All-cause mortality (Table S2)

**Table S2.** All-cause mortality.

|               | Hazard ratio | Lower CI limit | Upper CI limit | p-value |
|---------------|--------------|----------------|----------------|---------|
| Overall       | 1.2382       | 1.1335         | 1.3525         | <0.0001 |
| low vs medium | 2.6670       | 1.3568         | 5.2422         | 0.0044  |
| low vs high   | 4.2077       | 2.2037         | 8.0340         | <0.0001 |

The change from the low to the high risk group increased the risk for death 4.21-fold vs 2.70 fold in the original version of the scale.

### A.2 In-hospital mortality (Table S3)

**Table S3.** In-hospital mortality.

|               | Hazard ratio | Lower CI limit | Upper CI limit | p-value |
|---------------|--------------|----------------|----------------|---------|
| Overall       | 1.2052       | 1.0821         | 1.3424         | 0.0007  |
| low vs medium | 1.7960       | 0.8411         | 3.8348         | 0.1303  |
| low vs high   | 2.8402       | 1.3798         | 5.8462         | 0.0046  |

*A.3. Clinical non-fatal events*

The strength of the association between CH2EST-OD score and study endpoints including non-fatal adverse events is presented in supplementary Table 4

**Table S4.** The strength of the association between CH2EST-score and study endpoints.

| Endpoint                                | Type          | Odds.ratio | Lower.Cl.limit | Upper.Cl.limit | p.value |
|-----------------------------------------|---------------|------------|----------------|----------------|---------|
| end of hospitalization - full recovery  | Overall       | 0.749      | 0.642          | 0.865          | 0.0001  |
|                                         | low vs medium | 0.421      | 0.195          | 0.884          | 0.0244  |
|                                         | low vs high   | 0.219      | 0.101          | 0.456          | <0.0001 |
| end of hospitalization - deterioration  | Overall       | 1.044      | 0.798          | 1.343          | 0.7451  |
|                                         | low vs medium | 1.791      | 0.369          | 12.871         | 0.4968  |
|                                         | low vs high   | 2.154      | 0.496          | 14.858         | 0.3508  |
| end of hospitalization - rehabilitation | Overall       | 1.059      | 0.854          | 1.303          | 0.5888  |
|                                         | low vs medium | 0.969      | 0.291          | 3.454          | 0.9596  |
|                                         | low vs high   | 1.200      | 0.399          | 4.057          | 0.7529  |
| end of hospitalization - death          | Overall       | 1.290      | 1.120          | 1.497          | 0.0005  |
|                                         | low vs medium | 2.575      | 1.113          | 6.402          | 0.0325  |
|                                         | low vs high   | 4.245      | 1.901          | 10.304         | 0.0007  |
| all-cause shock                         | Overall       | 1.006      | 0.864          | 1.168          | 0.9337  |
|                                         | low vs medium | 1.760      | 0.763          | 4.281          | 0.1952  |
|                                         | low vs high   | 1.397      | 0.611          | 3.367          | 0.4388  |
| hypovolemic shock                       | Overall       | 0.668      | 0.403          | 1.000          | 0.0769  |
|                                         | low vs medium | 1.169      | 0.273          | 5.922          | 0.8359  |
|                                         | low vs high   | NA         | NA             | NA             | NA      |
| cardiogenic shock                       | Overall       | 1.726      | 1.183          | 2.664          | 0.0069  |
|                                         | low vs medium | NA         | NA             | NA             | NA      |
|                                         | low vs high   | NA         | NA             | NA             | NA      |
| septic shock                            | Overall       | 1.057      | 0.902          | 1.235          | 0.4897  |
|                                         | low vs medium | 1.899      | 0.746          | 5.289          | 0.1935  |
|                                         | low vs high   | 2.145      | 0.877          | 5.826          | 0.1095  |
| pulmonary embolism                      | Overall       | 0.798      | 0.571          | 1.068          | 0.1551  |
|                                         | low vs medium | 1.958      | 0.534          | 9.300          | 0.3396  |
|                                         | low vs high   | 0.378      | 0.048          | 2.355          | 0.2954  |
| deep vein thrombosis                    | Overall       | 0.957      | 0.273          | 2.376          | 0.9291  |
|                                         | low vs medium | NA         | NA             | NA             | NA      |
|                                         | low vs high   | NA         | NA             | NA             | NA      |
| venous thromboembolic disease           | Overall       | 0.798      | 0.571          | 1.068          | 0.1551  |
|                                         | low vs medium | 1.958      | 0.534          | 9.300          | 0.3396  |
|                                         | low vs high   | 0.378      | 0.048          | 2.355          | 0.2954  |

| Endpoint                     | Type          | Odds.ratio | Lower.CI.limit | Upper.CI.limit | p.value |
|------------------------------|---------------|------------|----------------|----------------|---------|
| myocardial infarction        | Overall       | 1.202      | 0.842          | 1.694          | 0.2929  |
|                              | low vs medium | 0.338      | 0.015          | 3.623          | 0.3813  |
|                              | low vs high   | 1.185      | 0.223          | 8.779          | 0.8478  |
| myocardial injury            | Overall       | 1.169      | 0.991          | 1.389          | 0.0678  |
|                              | low vs medium | 2.059      | 0.758          | 6.063          | 0.1687  |
|                              | low vs high   | 3.217      | 1.216          | 9.309          | 0.0229  |
| acute heart failure          | Overall       | 2.699      | 1.874          | 4.315          | <0.0001 |
|                              | low vs medium | NA         | NA             | NA             | NA      |
|                              | low vs high   | NA         | NA             | NA             | NA      |
| stroke/TIA                   | Overall       | 0.413      | 0.025          | 1.458          | 0.3357  |
|                              | low vs medium | NA         | NA             | NA             | NA      |
|                              | low vs high   | NA         | NA             | NA             | NA      |
| complete respiratory failure | Overall       | 1.054      | 0.784          | 1.433          | 0.7266  |
|                              | low vs medium | 0.343      | 0.038          | 2.267          | 0.2867  |
|                              | low vs high   | 0.550      | 0.067          | 3.319          | 0.5322  |
| SIRS                         | Overall       | 1.072      | 0.865          | 1.318          | 0.5163  |
|                              | low vs medium | 1.238      | 0.353          | 4.955          | 0.7443  |
|                              | low vs high   | 1.709      | 0.548          | 6.456          | 0.382   |
| sepsis                       | Overall       | 1.155      | 0.593          | 2.164          | 0.6393  |
|                              | low vs medium | NA         | NA             | NA             | NA      |
|                              | low vs high   | NA         | NA             | NA             | NA      |
| acute kidney injury          | Overall       | 1.179      | 1.015          | 1.373          | 0.0315  |
|                              | low vs medium | 1.899      | 0.746          | 5.289          | 0.1935  |
|                              | low vs high   | 3.181      | 1.332          | 8.517          | 0.0133  |
| acute liver dysfunction      | Overall       | 1.294      | 0.965          | 1.738          | 0.081   |
|                              | low vs medium | 2.104      | 0.260          | 43.258         | 0.5249  |
|                              | low vs high   | 3.711      | 0.608          | 71.237         | 0.2315  |
| MODS                         | Overall       | 1.092      | 0.787          | 1.483          | 0.5819  |
|                              | low vs medium | 2.130      | 0.264          | 43.765         | 0.5179  |
|                              | low vs high   | 3.062      | 0.476          | 59.595         | 0.3134  |
| all bleedings                | Overall       | 1.058      | 0.830          | 1.334          | 0.6352  |
|                              | low vs medium | 3.871      | 0.963          | 25.955         | 0.0898  |
|                              | low vs high   | 1.500      | 0.310          | 10.758         | 0.6358  |
| intracranial bleeding        | Overall       | 0.837      | 0.334          | 1.633          | 0.6408  |
|                              | low vs medium | NA         | NA             | NA             | NA      |
|                              | low vs high   | NA         | NA             | NA             | NA      |
| respiratory tract bleeding   | Overall       | 1.244      | 0.851          | 1.802          | 0.2441  |
|                              | low vs medium | NA         | NA             | NA             | NA      |
|                              | low vs high   | NA         | NA             | NA             | NA      |
| upper-GI-tract bleeding      | Overall       | 1.036      | 0.683          | 1.505          | 0.8572  |
|                              | low vs medium | 2.130      | 0.264          | 43.765         | 0.5179  |
|                              | low vs high   | 1.181      | 0.110          | 25.795         | 0.8932  |
| lower-GI-tract-bleeding      | Overall       | 0.957      | 0.273          | 2.376          | 0.9291  |
|                              | low vs medium | NA         | NA             | NA             | NA      |

| Endpoint                         | Type          | Odds.ratio | Lower.CI.limit | Upper.CI.limit | p.value |
|----------------------------------|---------------|------------|----------------|----------------|---------|
| urinary tract bleeding           | low vs high   | NA         | NA             | NA             | NA      |
|                                  | Overall       | 0.710      | 0.243          | 1.456          | 0.4264  |
|                                  | low vs medium | 0.690      | 0.027          | 17.731         | 0.7949  |
| pneumonia                        | low vs high   | NA         | NA             | NA             | NA      |
|                                  | Overall       | 1.058      | 0.920          | 1.220          | 0.4353  |
|                                  | low vs medium | 0.938      | 0.440          | 1.978          | 0.8659  |
| new cognitive signs and symptoms | low vs high   | 1.276      | 0.605          | 2.670          | 0.5175  |
|                                  | Overall       | 0.990      | 0.667          | 1.407          | 0.9577  |
|                                  | low vs medium | NA         | NA             | NA             | NA      |
| Admission at ICU                 | low vs high   | 0.774      | 0.164          | 4.067          | 0.7439  |
|                                  | Overall       | 0.931      | 0.806          | 1.071          | 0.3214  |
|                                  | low vs medium | 1.097      | 0.516          | 2.363          | 0.8103  |
|                                  | low vs high   | 0.954      | 0.457          | 2.019          | 0.8997  |

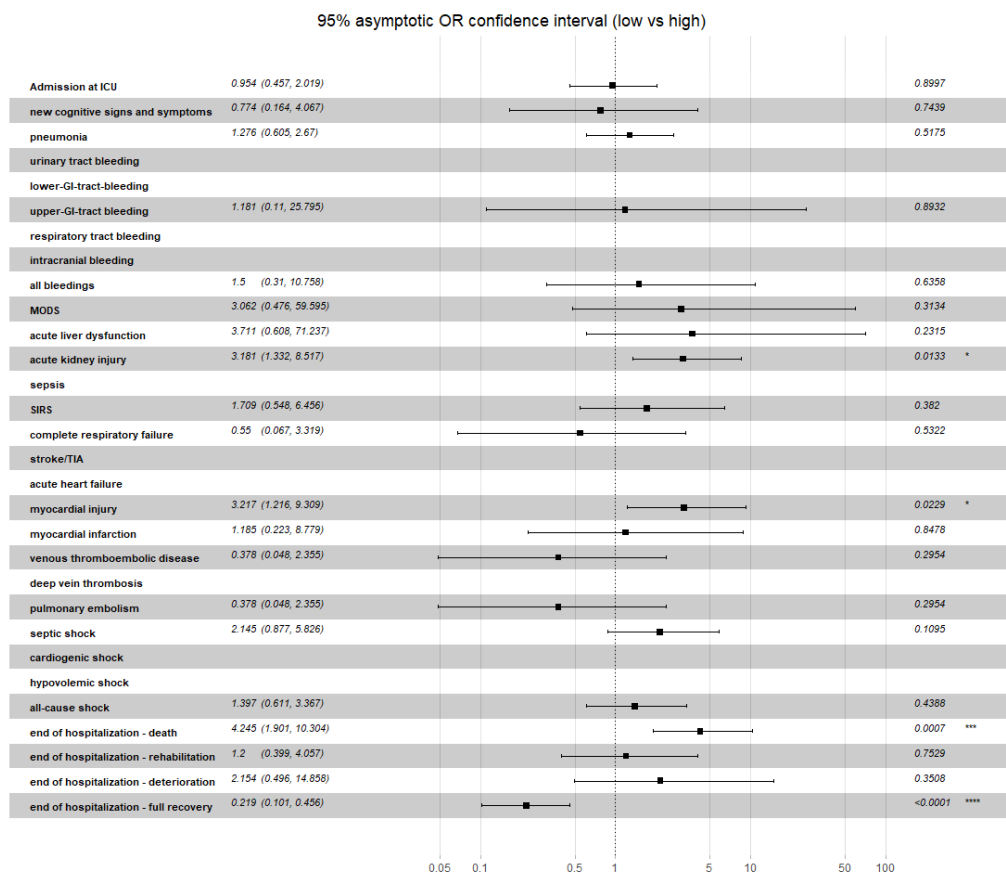

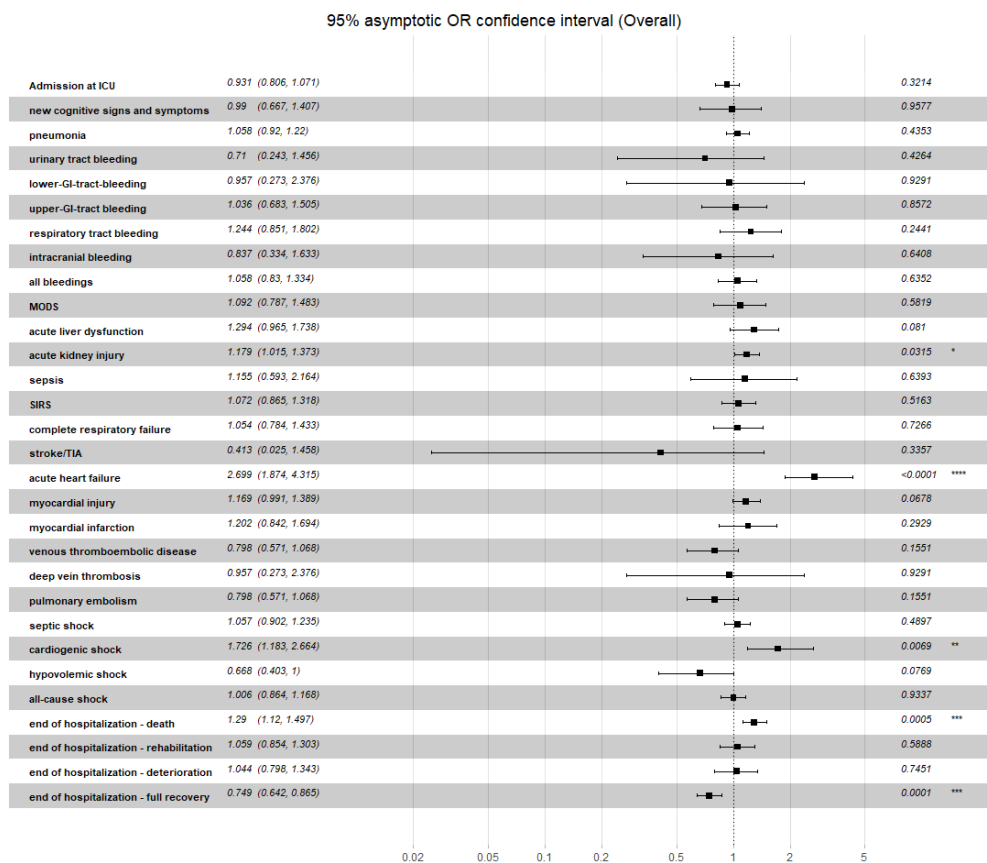

Figure S2. 95% Asymptotic OR Confidence Interval (low vs high & Overall).

### 3. Sub-analysis of the survival based on the ICU admission in particular C2HEST score strata

The presented below Kaplan-Meier (Figure S3) survival function presents the usefulness of the C2HEST score in predicting the mortality of elderly subjects who were admitted directly to the intensive care unit (due to COVID severity) vs. those admitted to the non-intensive ward of the medical university center due to COVID-19. The C2HEST score revealed to determine the outcome irrespectively on the initial symptom severity with the log-rank p-value of  $<0.0001$ :



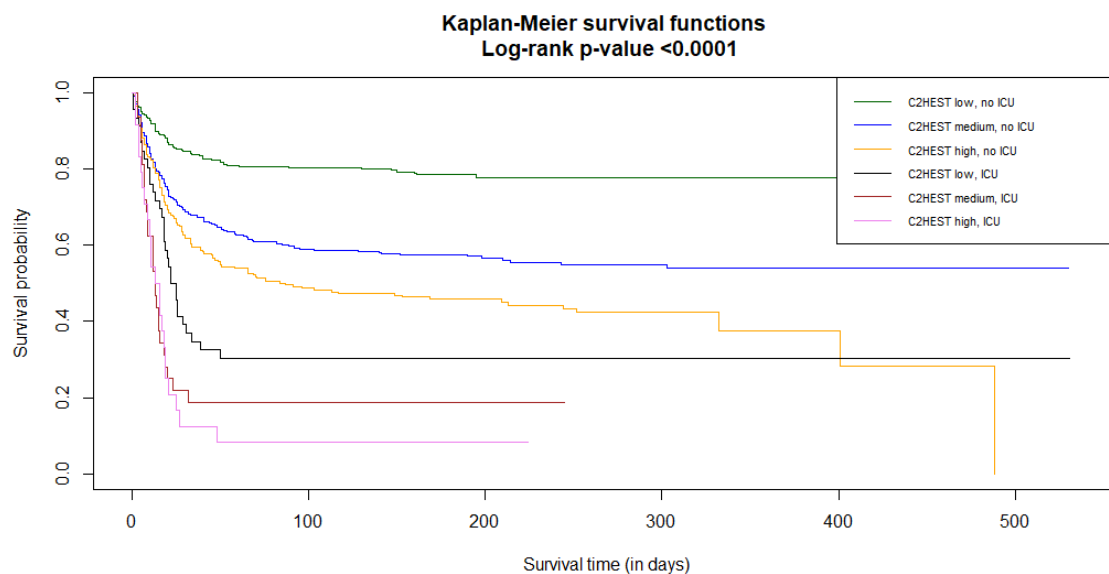

**Figure S3.** Kaplan-Meier survival function.

The C2HEST predictive value in transfer of COVID-19 elderly subjects to the ICU following clinical deterioration is presented in the Table S5:

**Table S5.** The C2HEST predictive value in transfer of COVID-19 elderly subjects to the ICU following clinical deterioration.

| Endpoint         | Type          | Odds.ratio | Lower.Cl.limit | Upper.Cl.limit | p.value |
|------------------|---------------|------------|----------------|----------------|---------|
| Admission at ICU | Overall       | 0.950      | 0.841          | 1.068          | 0.3958  |
|                  | low vs medium | 0.593      | 0.366          | 0.950          | 0.031   |
|                  | low vs high   | 0.755      | 0.442          | 1.261          | 0.2913  |

Also, the logistic regression model was developed to analyze the description of the admission at ICU by particular C2HEST components, where the strongest predictive value for ICU admission had the presence of hypertension, coronary artery disease and HFrEF (Table S6).

**Table S6.** The logistic regression model.

| Endpoint         | Component               | Odds.ratio | Lower.Cl.limit | Upper.Cl.limit | p.value |
|------------------|-------------------------|------------|----------------|----------------|---------|
| Admission at ICU | Coronary artery disease | 1.443      | 0.831          | 2.446          | 0.1814  |
|                  | COPD                    | 0.631      | 0.212          | 1.508          | 0.3476  |
|                  | Age                     | 0.351      | 0.218          | 0.549          | <0.0001 |
|                  | Thyroid Disease         | 0.373      | 0.142          | 0.810          | 0.0239  |
|                  | Hypertension            | 1.794      | 1.092          | 3.051          | 0.0251  |
|                  | HFrEF                   | 1.519      | 0.879          | 2.574          | 0.1261  |
